# Supplementary material for: Targeting Ras-, Rho-, and Rab-family GTPases via a conserved cryptic pocket
Source: PubMed Central journal article supplement (PMC11531380; doi:10.1016/j.cell.2024.08.017), 2024-09-09
Supplement: NIHMS2023477-supplement-MMC1.pdf [file NIHMS2023477-supplement-MMC1.pdf]

**Cell, Volume 187**

**Supplemental information**

**Targeting Ras-, Rho-, and Rab-family GTPases**

**via a conserved cryptic pocket**

**Johannes Morstein, Victoria Bowcut, Micah Fernando, Yue Yang, Lawrence Zhu, Meredith L. Jenkins, John T. Evans, Keelan Z. Guiley, D. Matthew Peacock, Sophie Krahnke, Zhi Lin, Katrine A. Taran, Benjamin J. Huang, Andrew G. Stephen, John E. Burke, Felice C. Lightstone, and Kevan M. Shokat**

**Table S1. X-ray crystallography data collection and refinement statistics. Related to Figure 1.**

Values in parentheses are for highest resolution shell.

|                                                     | H-Ras (G12C)-sotorasib |
|-----------------------------------------------------|------------------------|
| Data collection                                     |                        |
| Space group                                         | H3 <sub>2</sub>        |
| Cell dimensions                                     |                        |
| <i>a</i> , <i>b</i> , <i>c</i> (Å)                  | 92.35, 92.35, 119.58   |
| $\alpha$ , $\beta$ , $\gamma$                       | 90, 90, 120            |
| Resolution (Å)                                      | 66.48-1.7 (1.73 – 1.7) |
| <i>R</i> <sub>merge</sub>                           | 0.052 (0.133)          |
| <i>R</i> <sub>pim</sub>                             | 0.036 (0.096)          |
| <i>I</i> / $\sigma$ <i>I</i>                        | 15.8 (6.8)             |
| CC 1/2                                              | 0.978 (0.560)          |
| Total reflections                                   | 102754 (5419)          |
| Unique Reflections                                  | 21497 (1122)           |
| Completeness (%)                                    | 99.1 (100.0)           |
| Redundancy                                          | 4.8 (4.8)              |
| Refinement                                          |                        |
| Resolution (Å)                                      | 33.28-1.7              |
| No. reflections                                     | 21560 (2158)           |
| <i>R</i> <sub>work</sub> / <i>R</i> <sub>free</sub> | 18.41/20.91            |
| No. atoms                                           | 1439                   |
| Protein                                             | 1290                   |
| Water                                               | 107                    |
| Refined <i>B</i> -factors (Å <sup>2</sup> )         |                        |
| Overall                                             | 18.66                  |
| Compound                                            | 21.83                  |
| water                                               | 25.67                  |
| R.m.s. deviations                                   |                        |
| Bond lengths (Å)                                    | 0.008                  |
| Bond angles (°)                                     | 1.00                   |
| Ramachandran analysis                               |                        |
| Favored (%)                                         | 98.7                   |
| Disallowed (%)                                      | 0                      |

**Table S2. HDX-MS Statistics. Related to Figure 3 and Figure 5.**

| Data set                       | RalA Apo                                                        | RalA – MRTX1257                                                 | Rab1a Apo                                                       | Rab1a - MRTX1257                                                |
|--------------------------------|-----------------------------------------------------------------|-----------------------------------------------------------------|-----------------------------------------------------------------|-----------------------------------------------------------------|
| HDX reaction details           | %D <sub>2</sub> O=75%<br>pH <sub>(read)</sub> =7.5<br>Temp=20°C | %D <sub>2</sub> O=75%<br>pH <sub>(read)</sub> =7.5<br>Temp=20°C | %D <sub>2</sub> O=75%<br>pH <sub>(read)</sub> =7.5<br>Temp=20°C | %D <sub>2</sub> O=75%<br>pH <sub>(read)</sub> =7.5<br>Temp=20°C |
| HDX time course (seconds)      | 3s,30s,300s,3000s                                               | 3s,30s,300s,3000s                                               | 3s,30s,300s,3000s<br>3000s                                      | 3s,30s,300s,3000s                                               |
| HDX controls                   | N/A                                                             | N/A                                                             | N/A                                                             | N/A                                                             |
| Back-exchange                  | No correction, deuterium levels are relative                    | No correction, deuterium levels are relative                    | No correction, deuterium levels are relative                    | No correction, deuterium levels are relative                    |
| Number of peptides             | 51                                                              | 51                                                              | 54                                                              | 54                                                              |
| Sequence coverage              | 87.9%                                                           | 87.9%                                                           | 88.8%                                                           | 88.8%                                                           |
| Average peptide /redundancy    | Length= 9.1<br>Redundancy= 2.6                                  | Length= 9.1<br>Redundancy= 2.6                                  | Length= 12.3<br>Redundancy= 2.8                                 | Length= 12.3<br>Redundancy= 2.8                                 |
| Replicates                     | 3                                                               | 3                                                               | 3                                                               | 3                                                               |
| Repeatability                  | Average StDev=0.9%                                              | Average StDev=0.9%                                              | Average StDev=0.9%                                              | Average StDev=0.7%                                              |
| Significant differences in HDX | >4.5% and >0.35 Da and unpaired t-test ≤0.01                    | >4.5% and >0.35 Da and unpaired t-test ≤0.01                    | >4.5% and >0.35 Da and unpaired t-test ≤0.01                    | >4.5% and >0.35 Da and unpaired t-test ≤0.01                    |
